# Supplementary material
Source: PubMed Central journal article supplement (PMC7796777)
Supplement: NIHMS1658859-supplement-Supplementary_Table_1_material.pdf [file NIHMS1658859-supplement-Supplementary_Table_1_material.pdf]

**Supplementary Table S1.** Doses to targets and organs at risk for each patient.

|                                         | Control Plan      |                  | Distorted Plan    |                  | Differences*       |                   |
|-----------------------------------------|-------------------|------------------|-------------------|------------------|--------------------|-------------------|
|                                         | D <sub>mean</sub> | D <sub>max</sub> | D <sub>mean</sub> | D <sub>max</sub> | ΔD <sub>mean</sub> | ΔD <sub>max</sub> |
| <b><i>Patient 1 (stomach tumor)</i></b> |                   |                  |                   |                  |                    |                   |
| PTV                                     | 46.41             | 50.07            | 46.40             | 49.95            | -0.01              | -0.12             |
| Cord                                    | 10.62             | 33.15            | 10.78             | 33.69            | 0.16               | 0.54              |
| Right Kidney                            | 1.47              | 7.39             | 1.55              | 7.41             | 0.08               | 0.02              |
| Left Kidney                             | 3.05              | 35.57            | 2.99              | 37.03            | -0.06              | 1.46              |
| Liver-GTV                               | 11.42             | 47.92            | 11.44             | 48.06            | 0.02               | 0.14              |
| Heart                                   | 11.35             | 50.07            | 10.33             | 49.96            | -1.02              | -0.11             |
| Superior Mesenteric Artery              | 46.42             | 47.82            | 46.05             | 46.90            | -0.37              | -0.92             |
| Celiac                                  | 46.54             | 47.23            | 46.58             | 47.19            | 0.04               | -0.04             |
| <b><i>Patient 2, liver tumor</i></b>    |                   |                  |                   |                  |                    |                   |
| PTV 67.5                                | 69.59             | 81.41            | 69.57             | 78.84            | -0.02              | -2.57             |
| PTV 37.5                                | 49.30             | 77.69            | 49.03             | 75.31            | -0.27              | -2.38             |
| Right Kidney                            | 8.51              | 26.94            | 8.83              | 29.52            | 0.32               | 2.58              |
| Left Kidney                             | 3.11              | 10.61            | 2.89              | 10.27            | -0.22              | -0.34             |
| Liver                                   | 29.86             | 81.41            | 29.79             | 78.84            | -0.07              | -2.57             |
| Liver-GTV                               | 23.95             | 76.98            | 23.90             | 76.45            | -0.05              | -0.53             |
| Partial Right Lung                      | 5.81              | 51.82            | 5.51              | 52.28            | -0.30              | 0.46              |
| Partial Left Lung                       | 4.46              | 17.11            | 4.20              | 17.63            | -0.26              | 0.52              |
| Partial Total Lung                      | 5.17              | 51.82            | 4.89              | 52.28            | -0.28              | 0.46              |
| Heart                                   | 4.77              | 34.35            | 4.87              | 36.65            | 0.10               | 2.30              |
| Partial Esophagus                       | 8.95              | 20.86            | 8.49              | 19.88            | -0.50              | -0.98             |
| Stomach                                 | 20.64             | 52.18            | 21.32             | 54.01            | 0.68               | 1.83              |
| Duodenum                                | 33.27             | 46.07            | 33.23             | 46.18            | -0.04              | 0.11              |
| Colon                                   | 21.56             | 65.04            | 22.54             | 63.22            | 0.98               | -1.82             |
| Spinal Cord                             | 5.59              | 12.96            | 5.28              | 12.55            | -0.31              | -0.41             |
| <b><i>Patient 3, liver tumor</i></b>    |                   |                  |                   |                  |                    |                   |
| PTV                                     | 56.85             | 61.95            | 56.81             | 63.94            | -0.04              | 1.99              |
| Liver                                   | 9.24              | 61.95            | 10.13             | 63.94            | 0.89               | 1.99              |
| Stomach Avoid                           | 1.85              | 9.96             | 2.39              | 12.96            | 0.54               | 3.00              |
| Bowel Avoid                             | 17.64             | 32.78            | 17.74             | 35.66            | 0.10               | 2.88              |
| Chest wall                              | 34.22             | 56.89            | 40.41             | 57.64            | 6.19               | 0.75              |
| <b><i>Patient 4, prostate tumor</i></b> |                   |                  |                   |                  |                    |                   |
| PTV                                     | 80.25             | 82.54            | 80.16             | 82.02            | -0.09              | -0.52             |
| Bladder                                 | 16.09             | 82.77            | 15.75             | 81.61            | -0.34              | -1.16             |
| Rectum                                  | 29.18             | 80.33            | 28.26             | 81.82            | -0.92              | 1.49              |
| Prostate                                | 80.20             | 81.66            | 80.23             | 81.47            | 0.03               | -0.19             |

|              |       |       |       |       |       |       |
|--------------|-------|-------|-------|-------|-------|-------|
| Prox SV      | 80.61 | 81.64 | 80.32 | 81.34 | -0.29 | -0.3  |
| Femoral Head | 18.78 | 40.45 | 18.19 | 37.31 | -0.59 | -3.14 |
| Bladder-PTV  | 11.92 | 80.60 | 11.63 | 80.11 | -0.29 | -0.49 |
| Rectum-PTV   | 23.69 | 74.01 | 22.75 | 72.37 | -0.94 | -1.64 |

***Patient 5, prostate tumor***

|                           |       |       |       |       |       |       |
|---------------------------|-------|-------|-------|-------|-------|-------|
| PTV                       | 79.97 | 83.01 | 79.86 | 83.67 | -0.11 | 0.66  |
| Prostate                  | 80.12 | 82.78 | 80.09 | 83.10 | -0.03 | 0.32  |
| Proximal Seminal Vesicles | 68.11 | 81.67 | 67.73 | 82.50 | -0.38 | 0.83  |
| Distal Seminal Vesicles   | 15.68 | 34.91 | 16.55 | 37.31 | 0.87  | 2.40  |
| Bladder                   | 19.63 | 81.60 | 19.34 | 80.98 | -0.29 | -0.62 |
| Rectum                    | 23.29 | 81.49 | 23.39 | 83.67 | 0.10  | 2.18  |
| Femoral Heads             | 5.24  | 33.74 | 6.18  | 35.19 | 0.94  | 1.45  |
| Sigmoid                   | 1.86  | 2.71  | 1.78  | 2.60  | -0.08 | -0.11 |
| Right Femur               | 6.16  | 33.74 | 7.49  | 35.19 | 1.33  | 1.45  |
| Left Femur                | 4.43  | 14.87 | 5.02  | 16.73 | 0.59  | 1.86  |

***Patient 6, lung tumor***

|             |       |       |       |       |       |       |
|-------------|-------|-------|-------|-------|-------|-------|
| PTV         | 58.87 | 68.38 | 58.82 | 68.42 | -0.05 | 0.04  |
| Spinal Cord | 3.59  | 20.50 | 3.44  | 19.30 | -0.15 | -1.20 |
| Esophagus   | 3.76  | 13.76 | 4.00  | 15.43 | 0.24  | 1.67  |
| Right Lung  | 3.73  | 68.38 | 3.77  | 67.95 | 0.04  | -0.43 |
| Left Lung   | 1.23  | 13.60 | 1.16  | 11.02 | -0.04 | -2.58 |
| Total Lung  | 2.48  | 67.07 | 2.46  | 67.09 | -0.02 | 0.02  |
| Heart       | 1.67  | 12.72 | 1.76  | 13.07 | 0.09  | 0.35  |
| Liver       | 2.87  | 57.16 | 2.74  | 55.32 | -0.13 | -1.84 |
| Chest Wall  | 4.55  | 64.34 | 4.54  | 67.12 | -0.01 | 2.78  |

***Patient 7, lung tumor***

|                     |       |       |       |       |       |       |
|---------------------|-------|-------|-------|-------|-------|-------|
| PTV                 | 74.63 | 80.35 | 74.54 | 80.46 | -0.09 | 0.11  |
| Spinal cord         | 6.98  | 29.54 | 5.80  | 32.57 | -1.18 | 3.03  |
| Esophagus           | 7.47  | 40.41 | 7.42  | 44.46 | -0.05 | 4.05  |
| Right Lung          | 11.71 | 80.35 | 11.83 | 80.67 | 0.12  | 0.32  |
| Left Lung           | 2.97  | 26.09 | 3.07  | 31.26 | 0.10  | 5.17  |
| Normal Lung (Total) | 7.34  | 79.79 | 7.45  | 80.67 | 0.11  | 0.88  |
| Heart               | 9.73  | 65.61 | 10.22 | 69.73 | 0.49  | 4.12  |
| Heart Atria         | 7.54  | 44.54 | 7.19  | 42.33 | -0.35 | -2.21 |
| Heart Ventricle     | 4.21  | 19.71 | 4.50  | 22.27 | 0.29  | 2.56  |
| Chest Wall          | 10.84 | 54.29 | 10.85 | 59.31 | 0.01  | 5.02  |

***Patient 8, nasopharynx tumor***

|        |       |       |       |       |      |       |
|--------|-------|-------|-------|-------|------|-------|
| PTV 70 | 72.02 | 76.04 | 72.13 | 74.12 | 0.11 | -1.92 |
| PTV 66 | 68.17 | 72.45 | 68.39 | 72.42 | 0.22 | -0.03 |

|                   |       |       |       |       |       |       |
|-------------------|-------|-------|-------|-------|-------|-------|
| PTV 59.4          | 62.56 | 75.59 | 62.47 | 74.11 | -0.09 | -1.48 |
| PTV 57            | 61.28 | 69.18 | 61.31 | 68.28 | 0.03  | -0.90 |
| Right Parotid     | 24.31 | 70.44 | 26.98 | 69.33 | 2.67  | -1.11 |
| Left Parotid      | 22.48 | 61.01 | 24.21 | 61.59 | 1.73  | 0.58  |
| RSM               | 36.66 | 63.31 | 37.15 | 60.63 | 0.49  | -2.68 |
| LSM               | 33.86 | 62.72 | 34.81 | 59.63 | 0.95  | -3.09 |
| Larynx Avoid      | 25.38 | 59.84 | 26.94 | 56.30 | 1.56  | -3.54 |
| Esophagus         | 32.49 | 60.14 | 34.26 | 57.81 | 1.77  | -2.33 |
| Right Lens        | 4.61  | 5.87  | 4.83  | 6.51  | 0.22  | 0.64  |
| Left Lens         | 4.47  | 5.82  | 4.93  | 6.22  | 0.46  | 0.40  |
| Right Cochlea     | 43.73 | 55.92 | 46.48 | 56.86 | 2.75  | 0.94  |
| Left Cochlea      | 29.05 | 32.70 | 29.12 | 33.56 | 0.07  | 0.86  |
| Right Optic Nerve | 26.16 | 49.91 | 33.27 | 50.56 | 7.11  | 0.65  |
| Left Optic Nerve  | 11.50 | 19.05 | 11.80 | 21.11 | 0.30  | 2.06  |
| Chiasm            | 27.02 | 46.31 | 26.71 | 47.37 | -0.31 | 1.06  |
| Spinal Cord       | 24.85 | 35.33 | 25.78 | 36.18 | 0.93  | 0.85  |
| Brainstem         | 39.62 | 60.80 | 41.64 | 62.82 | 2.02  | 2.02  |
| Oral Avoidance    | 25.48 | 63.39 | 25.43 | 60.44 | -0.05 | -2.95 |

***Patient 9, right neck tumor***

|                        |       |       |       |       |       |       |
|------------------------|-------|-------|-------|-------|-------|-------|
| PTV 45                 | 47.16 | 50.16 | 47.36 | 49.94 | 0.20  | -0.22 |
| PTV 40                 | 45.77 | 49.37 | 45.73 | 50.15 | -0.04 | 0.78  |
| Spinal Cord            | 3.87  | 9.61  | 3.98  | 10.22 | 0.11  | 0.61  |
| Right Cochlea          | 0.49  | 0.54  | 0.56  | 0.62  | 0.07  | 0.08  |
| Left Cochlea           | 0.21  | 0.24  | 0.21  | 0.24  | 0.00  | 0.00  |
| Oral Avoid             | 9.38  | 28.08 | 8.84  | 26.72 | -0.54 | -1.36 |
| Right Carotid          | 30.40 | 44.91 | 31.13 | 45.24 | 0.73  | 0.33  |
| Left Carotid           | 2.14  | 2.91  | 1.95  | 3.23  | -0.19 | 0.32  |
| Right Parotid          | 15.50 | 43.76 | 16.92 | 44.56 | 1.42  | 0.80  |
| Right Parotid Critical | 12.30 | 34.55 | 16.35 | 38.45 | 4.05  | 3.90  |
| Brainstem              | 4.31  | 6.76  | 4.73  | 7.99  | 0.42  | 1.23  |
| Brain                  | 0.14  | 10.30 | 0.18  | 11.50 | 0.04  | 1.20  |
| Right Parotid Avoid    | 15.71 | 43.76 | 17.20 | 44.56 | 1.49  | 0.80  |
| Right Carotid Avoid    | 28.46 | 42.57 | 29.31 | 42.37 | 0.85  | -0.20 |

***Patient 10, left occipital tumor***

|               |       |       |       |       |       |       |
|---------------|-------|-------|-------|-------|-------|-------|
| PTV 42.5      | 44.74 | 46.23 | 44.74 | 48.92 | 0.00  | 2.69  |
| PTV 37.5      | 42.66 | 46.23 | 42.32 | 48.92 | -0.34 | 2.69  |
| Spinal Cord   | 5.69  | 9.35  | 5.46  | 9.15  | -0.23 | -0.20 |
| Brain Stem    | 1.27  | 10.73 | 1.38  | 10.29 | 0.11  | -0.44 |
| Left Parotid  | 4.71  | 12.10 | 4.78  | 11.90 | 0.07  | -0.20 |
| Right Cochlea | 0.47  | 0.58  | 0.42  | 0.50  | -0.05 | -0.08 |
| Left Cochlea  | 2.36  | 3.37  | 2.16  | 3.00  | -0.20 | -0.37 |

|                   |       |       |       |       |       |       |
|-------------------|-------|-------|-------|-------|-------|-------|
| Pharynx & Mastoid | 15.59 | 29.58 | 14.83 | 30.55 | -0.76 | 0.97  |
| Right Carotid     | 4.93  | 9.94  | 4.73  | 9.85  | -0.20 | -0.09 |
| Left Carotid      | 12.47 | 43.24 | 12.62 | 43.33 | 0.15  | 0.09  |
| Right Optic Nerve | 0.15  | 0.19  | 0.14  | 0.16  | -0.01 | -0.03 |
| Left Optic Nerve  | 0.16  | 0.22  | 0.16  | 0.21  | 0.00  | -0.01 |
| Optic Chiasm      | 0.19  | 0.21  | 0.18  | 0.20  | -0.01 | -0.01 |
| Cerebellum        | 9.74  | 38.54 | 9.81  | 38.81 | 0.07  | 0.27  |

***Patient 11, T9-T10 spinal tumor***

|                   |       |       |       |       |       |       |
|-------------------|-------|-------|-------|-------|-------|-------|
| PTV Boost 40      | 41.71 | 44.42 | 41.72 | 45.42 | 0.01  | 1.00  |
| PTV 30            | 34.13 | 43.60 | 34.83 | 45.79 | 0.70  | 2.19  |
| Spinal Cord       | 28.02 | 32.72 | 28.01 | 34.04 | -0.01 | 1.32  |
| Right Kidney Mass | 16.36 | 38.80 | 17.60 | 37.39 | 1.24  | -1.41 |
| Bowel Bag         | 6.88  | 21.31 | 6.90  | 20.59 | 0.02  | -0.72 |
| Left Kidney       | 8.19  | 29.89 | 8.37  | 31.25 | 0.18  | 1.36  |
| Right Kidney      | 9.15  | 21.60 | 9.33  | 20.74 | 0.18  | -0.86 |
| Liver             | 6.70  | 35.57 | 6.90  | 33.79 | 0.20  | -1.78 |
| Heart             | 1.34  | 9.25  | 1.23  | 7.59  | -0.11 | -1.66 |

***Patient 12, T12 spinal tumor***

|              |       |       |       |       |       |       |
|--------------|-------|-------|-------|-------|-------|-------|
| GTV 24       | 26.08 | 28.44 | 26.09 | 29.31 | 0.01  | 0.87  |
| CTV 16       | 19.22 | 26.75 | 19.29 | 26.84 | 0.07  | 0.09  |
| Bone         | 6.72  | 28.25 | 6.84  | 29.21 | 0.12  | 0.96  |
| Spinal Cord  | 7.55  | 11.11 | 7.22  | 11.97 | -0.33 | 0.86  |
| Bowel        | 1.67  | 5.12  | 1.60  | 4.84  | -0.07 | -0.28 |
| Right Kidney | 1.07  | 7.67  | 1.07  | 8.24  | 0.00  | 0.57  |
| Cauda        | 4.73  | 13.14 | 5.17  | 13.57 | 0.44  | 0.43  |

***Patient 13, L3 spinal tumor***

|              |       |       |       |       |       |       |
|--------------|-------|-------|-------|-------|-------|-------|
| GTV 24       | 25.81 | 28.53 | 25.81 | 29.00 | 0.00  | 0.47  |
| CTV 16       | 18.77 | 26.97 | 18.57 | 26.68 | -0.20 | -0.29 |
| Bone         | 7.26  | 28.53 | 7.49  | 29.00 | 0.23  | 0.47  |
| Cauda        | 8.61  | 15.80 | 9.17  | 16.25 | 0.56  | 0.45  |
| Right Kidney | 1.83  | 10.02 | 1.95  | 10.56 | 0.12  | 0.54  |
| Left Kidney  | 1.21  | 6.67  | 1.22  | 5.86  | 0.01  | -0.81 |
| Bowel        | 3.27  | 10.80 | 3.32  | 10.56 | 0.05  | -0.24 |

***Patient 14, T11 spinal tumor***

|              |       |       |       |       |       |       |
|--------------|-------|-------|-------|-------|-------|-------|
| GTV 24       | 25.54 | 26.39 | 25.54 | 26.49 | 0.00  | 0.10  |
| CTV 16       | 19.73 | 26.39 | 19.83 | 26.49 | 0.10  | 0.10  |
| Spinal Cord  | 4.80  | 11.39 | 3.94  | 10.31 | -0.86 | -1.08 |
| Bowel        | 0.71  | 8.49  | 0.69  | 8.52  | -0.02 | 0.03  |
| Right Kidney | 0.02  | 0.17  | 0.02  | 0.18  | 0.00  | 0.01  |

|             |      |       |      |       |       |       |
|-------------|------|-------|------|-------|-------|-------|
| Left Kidney | 0.19 | 4.90  | 0.18 | 4.65  | -0.01 | -0.25 |
| Aorta       | 3.35 | 21.84 | 3.18 | 22.78 | -0.17 | 0.94  |
| Stomach     | 2.03 | 6.56  | 1.83 | 6.35  | -0.20 | -0.21 |

---

All values shown are in Gy.

\*Differences of >2 Gy for Dmean and >3 Gy for Dmax were considered to be clinically meaningful.

Abbreviations: PTV, planning target volume; GTV, gross tumor volume; PTVx, PTV volume covered by x% of the dose prescription for each target.
